# Supplementary material
Source: PubMed Central journal article supplement (PMC1570443)
Supplement: 7601317s1.pdf [file 7601317s1.pdf]

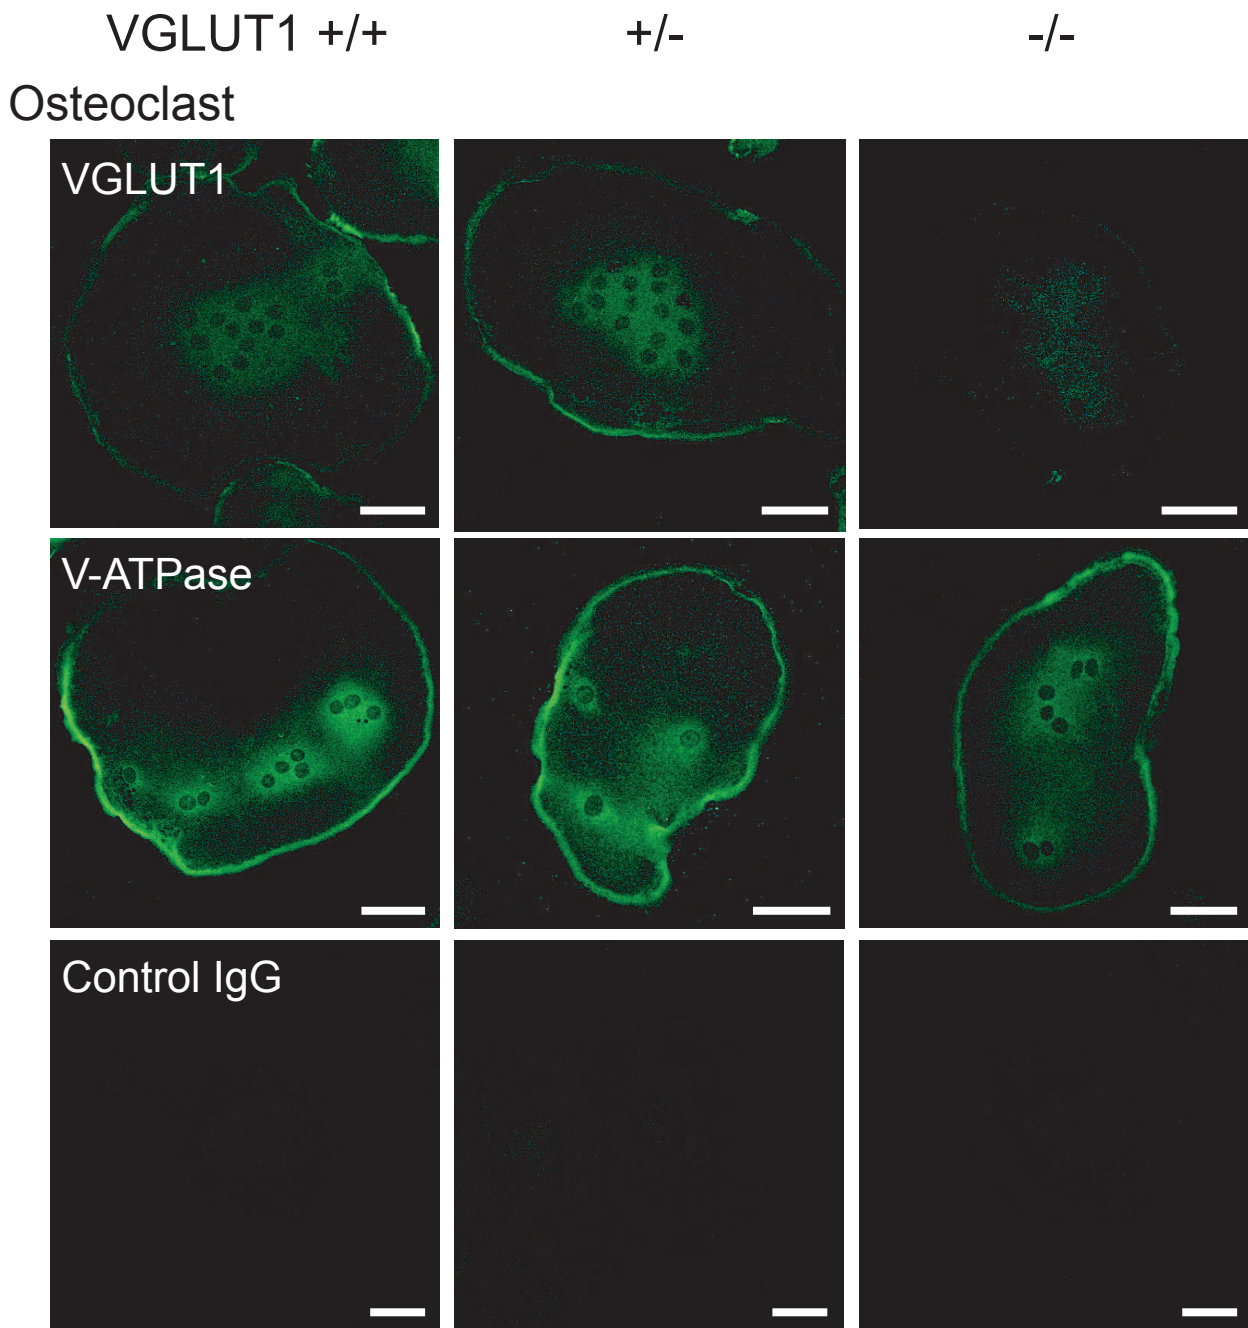

Cerebral cortex

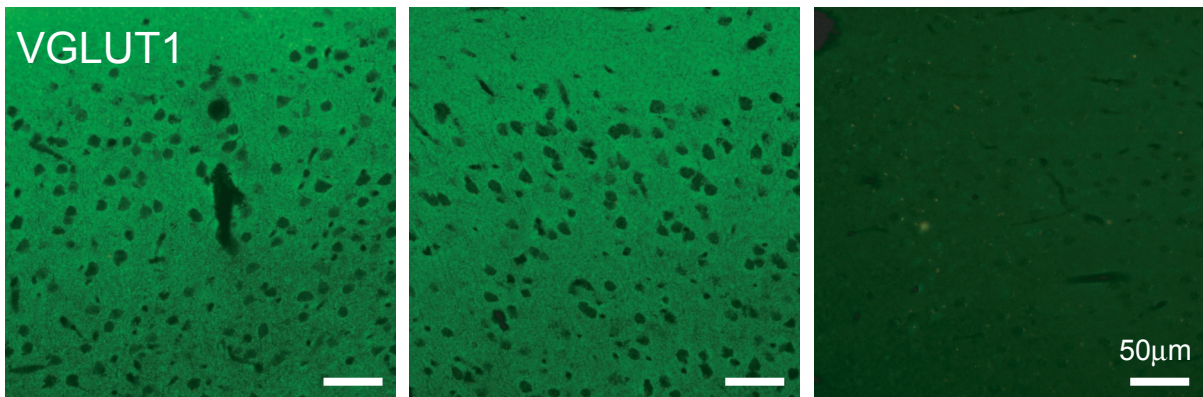

Supplementary Information  
Figure S1  
Morimoto, R et al.

Figure S1. Immunohistochemical localization of VGLUT1 in osteoclasts prepared from bone marrow of wild type VGLUT1<sup>+/+</sup>, VGLUT1<sup>+/-</sup> or VGLUT1<sup>-/-</sup>. Expression of VGLUT1 or V-ATPase subunit A was detected by indirect immunofluorescence microscopy. Data with control IgG were also shown as a negative control. Expression of VGLUT1 in cerebral cortex of these mice was also shown as another control. Bar = 50  $\mu$ m.
