# Supplementary material
Source: PubMed Central journal article supplement (PMC1570443)
Supplement: 7601317s2.pdf [file 7601317s2.pdf]

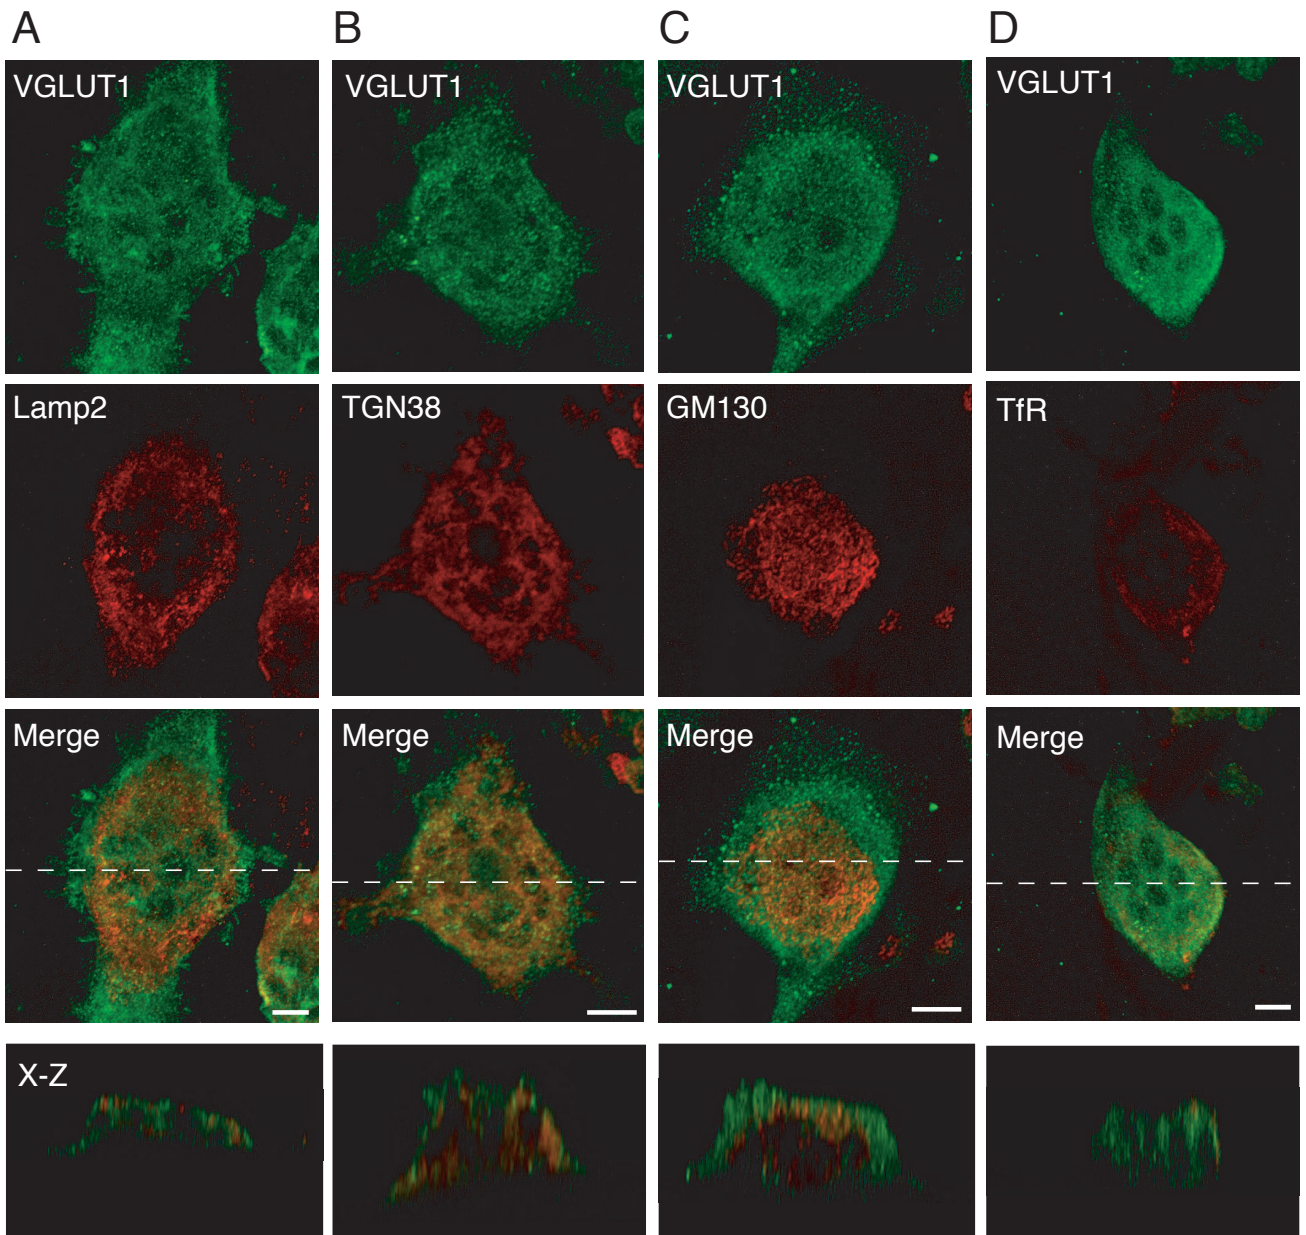

Supplementary Information  
Figure S2  
Morimoto, R et al.

Figure S2. Localization of VGLUT1 in osteoclasts grown on bone pieces was examined by double-labeling immunofluorescence microscopy. The staining pairs were as follows: VGLUT1 and Lamp 2 (A), VGLUT1 and TGN38 (B), VGLUT1 and GM130 (C), VGLUT1 and transferrin receptor (TfR) (D). The immunological localization was observed under a confocal microscope. A horizontal view of a merged picture is also shown. Bar = 10  $\mu$ m.
