# Supplementary material
Source: PubMed Central journal article supplement (PMC1570443)
Supplement: 7601317s3.pdf [file 7601317s3.pdf]

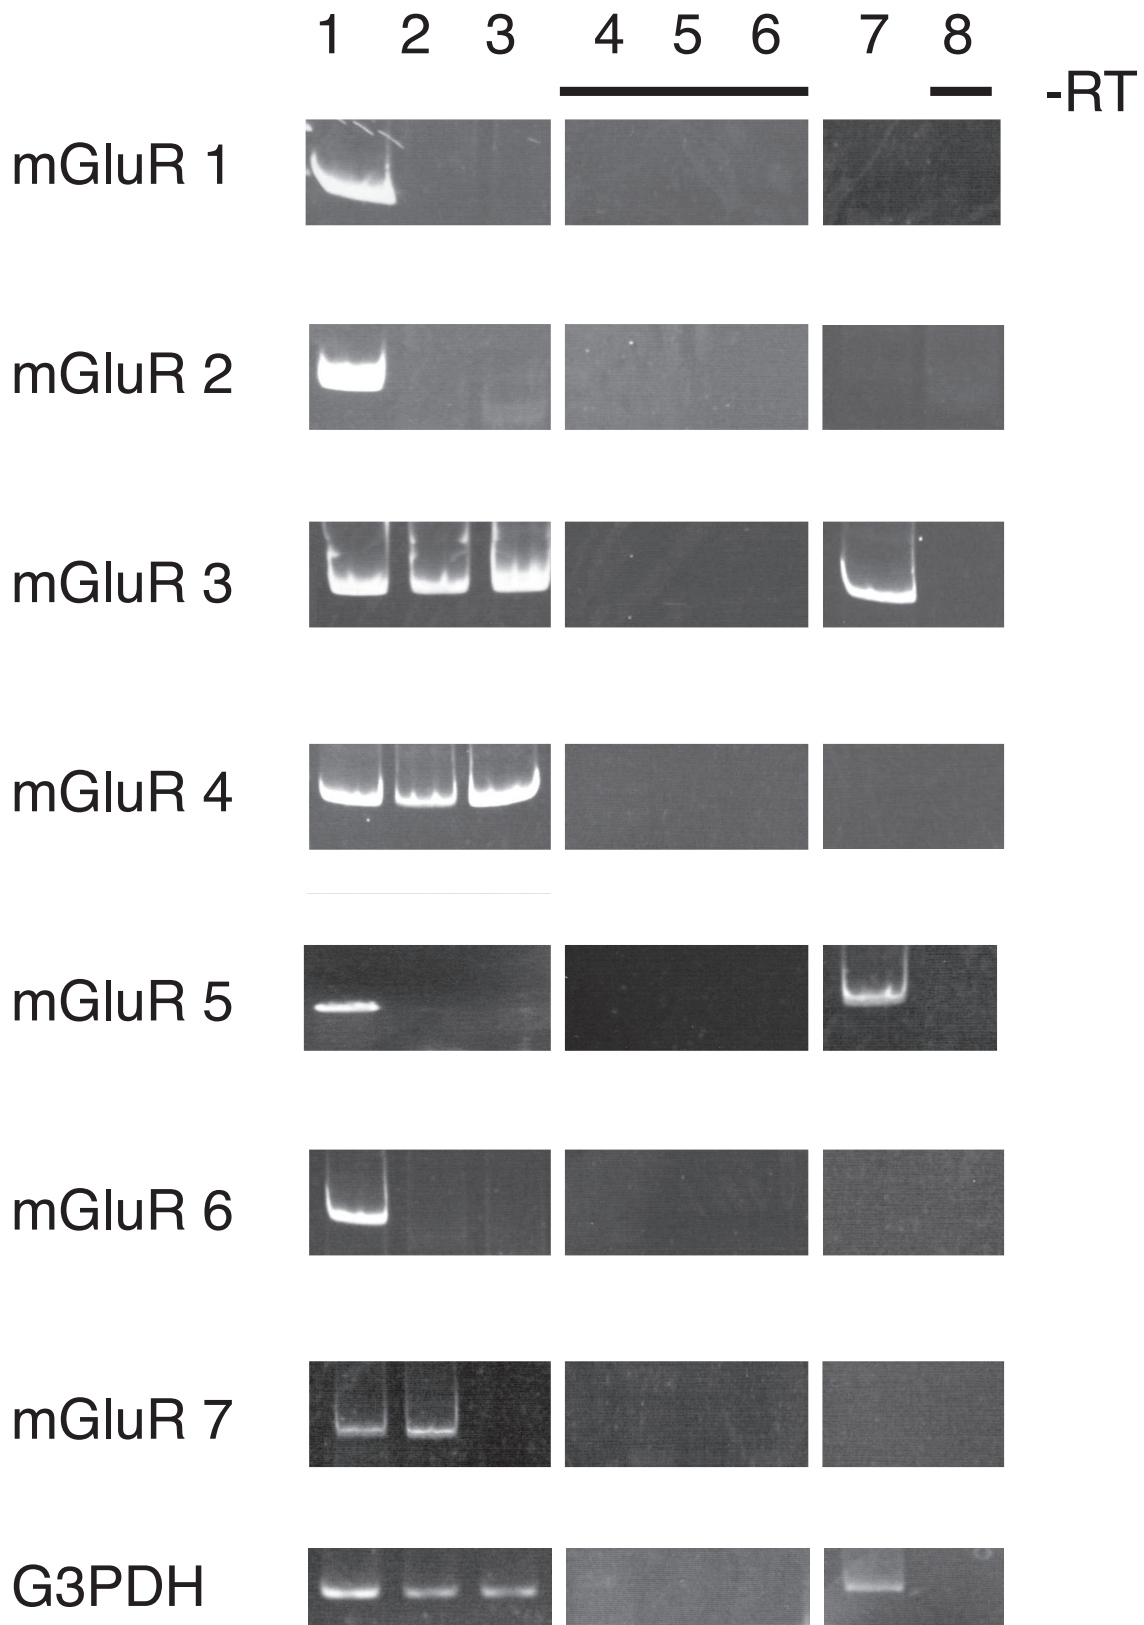

Supplementary Information  
Figure S3  
Morimoto, R et al.

Figure S3. Expression of mGluRs genes other than mGluR8 in osteoclasts.

Results of RT-PCR analysis of total cellular RNA were shown. Expression of genes of the indicated mGluR isoform in brain (lanes 1 and 4, as control), RAW264.7 cells (lanes 2 and 5), RAW264.7 cells treated with RANKL (lanes 3 and 6), and osteoclasts (lanes 7 and 8) were shown. The PCR products were not detected if reverse transcriptase is omitted from the reaction mixture (-RT) (lanes 4-6 and 8). The G3PDH transcript, as a loading control, is also shown.
