# Supplementary material
Source: PubMed Central journal article supplement (PMC1570443)
Supplement: 7601317s4.pdf [file 7601317s4.pdf]

## PCR primers used for detection of different VGLUTs and mGluRs.

| name   | size  | primer sequences |      |                                |      | Tm (°C) | Genbank No. |
|--------|-------|------------------|------|--------------------------------|------|---------|-------------|
| VGLUT1 | 335bp | 1687             | 5'-- | AGTGAAATGGAAGACGAGGTT --3'     | 1707 | 56°C    | U07609      |
|        |       | 2002             | 5'-- | TTCGGCACGAGCTTGAAACT --3'      | 2021 |         |             |
| VGLUT2 | 627bp | 1874             | 5'-- | CATCTCCTTCTTCGTGCTT --3'       | 1892 | 56°C    | AF324864    |
|        |       | 2480             | 5'-- | GACTTGCTTGGTTGATATGTT --3'     | 2500 |         |             |
| VGLUT3 | 330bp | 74               | 5'-- | AGGAAGGAGTGAAGAATCCCG --3'     | 94   | 56°C    | AF510321    |
|        |       | 383              | 5'-- | GTTTCCCATCCACATACACAG --3'     | 403  |         |             |
| -----  |       |                  |      |                                |      |         |             |
| mGluR1 | 207bp | 1155             | 5'-- | AAATCTACAGCAATGCTGGCGA --3'    | 1176 | 55°C    | M61099      |
|        |       | 1340             | 5'-- | CTTCGATGACTTCATCTCTGTC --3'    | 1361 |         |             |
| mGluR2 | 301bp | 1091             | 5'-- | CCACTCTCTGCGGGCCGTGCC --3'     | 1112 | 64°C    | M92075      |
|        |       | 1369             | 5'-- | CCTATCTGCGGGCAGGCAGTGGG --3'   | 1391 |         |             |
| mGluR3 | 396bp | 746              | 5'-- | GCTCCAACATCCGCAAGTCCTA --3'    | 767  | 59°C    | M92076      |
|        |       | 1120             | 5'-- | GACAAGCACCTGGCCATTGACA --3'    | 1141 |         |             |
| mGluR4 | 373bp | 2023             | 5'-- | TGTTGCTCCGCCGATCTTCCTA --3'    | 2046 | 64°C    | M92077      |
|        |       | 2372             | 5'-- | TCTCGGGTCTTGATGGCGTACACAG --3' | 2395 |         |             |
| mGluR5 | 514bp | 1254             | 5'-- | GTCTCCTGATGTCAAGTGGTT --3'     | 1274 | 56°C    | D10891      |
|        |       | 1747             | 5'-- | GGACCACACTTCGTCATCATC --3'     | 1767 |         |             |
| mGluR6 | 338bp | 324              | 5'-- | CTGAAGAAAGAGCAAGGCGTG --3'     | 344  | 50°C    | D13963      |
|        |       | 640              | 5'-- | ATCTGGGGTATCGCAAACAGGC --3'    | 661  |         |             |
| mGluR7 | 416bp | 1415             | 5'-- | AGGGCAACCGTGAAGGATTTG --3'     | 1436 | 60°C    | D16817      |
|        |       | 1810             | 5'-- | TCATAACGCCCTGGAGCATCG --3'     | 1830 |         |             |
| mGluR8 | 400bp | 482              | 5'-- | CCATATTCACCAAGCCCGACAAG --3'   | 504  | 59°C    | U63288      |
|        |       | 861              | 5'-- | GTCTCCAGCAGGCGTTTGATA --3'     | 881  |         |             |
